# Supplementary material for: A multi-country analysis of COVID-19 hospitalizations by vaccination status
Source: PubMed Central journal article supplement (PMC10935543; doi:10.1016/j.medj.2023.08.005), 2023-11-10
Supplement: mmc1.pdf [file mmc1.pdf]

**Med, Volume 4**

## **Supplemental information**

### **A multi-country analysis of COVID-19 hospitalizations by vaccination status**

**Bronner P. Gonçalves, Waasila Jassat, Joaquín Baruch, Madiha Hashmi, Amanda Rojek, Abhishek Dasgupta, Ignacio Martin-Loeches, Luis Felipe Reyes, Chiara Piubelli, Barbara Wanjiru Citarella, Christiana Kartsonaki, Benjamin Lefèvre, José W. López Revilla, Miles Lunn, Ewen M. Harrison, Moritz U.G. Kraemer, Sally Shrapnel, Peter Horby, Zeno Bisoffi, Piero L. Olliaro, Laura Merson, and ISARIC Clinical Characterisation Group**

## **Supplementary Appendix**

### **Title**

A multi-country analysis of COVID-19 hospitalisations by vaccination status

### ***Summary***

Supplementary Figures (Figures S1-S4)

Supplementary Tables (Tables S1-S10)

## Supplementary figures

**Figure S1. Vaccination coverage and relative frequencies of SARS-CoV-2 variants in countries contributing data to this study, related to Figure 1.** Data used to generate this figure are publicly available, and described in the *Methods* section. Only countries with 100 or more patients in the analytic sample were included. In each panel, the dashed black line corresponds to vaccine coverage, and coloured lines correspond to relative frequencies of the four variants in this analysis. The coloured areas represent periods when SARS-CoV-2 variants were dominant, here defined as causing 90% or more of infections in the genomic database, GISAID; only epidemiological weeks with at least 10 samples informing country-specific variant composition were analysed, and after the start of each variant period, drops in frequencies to the interval between 80 and 90% were not considered in defining the end of the period.

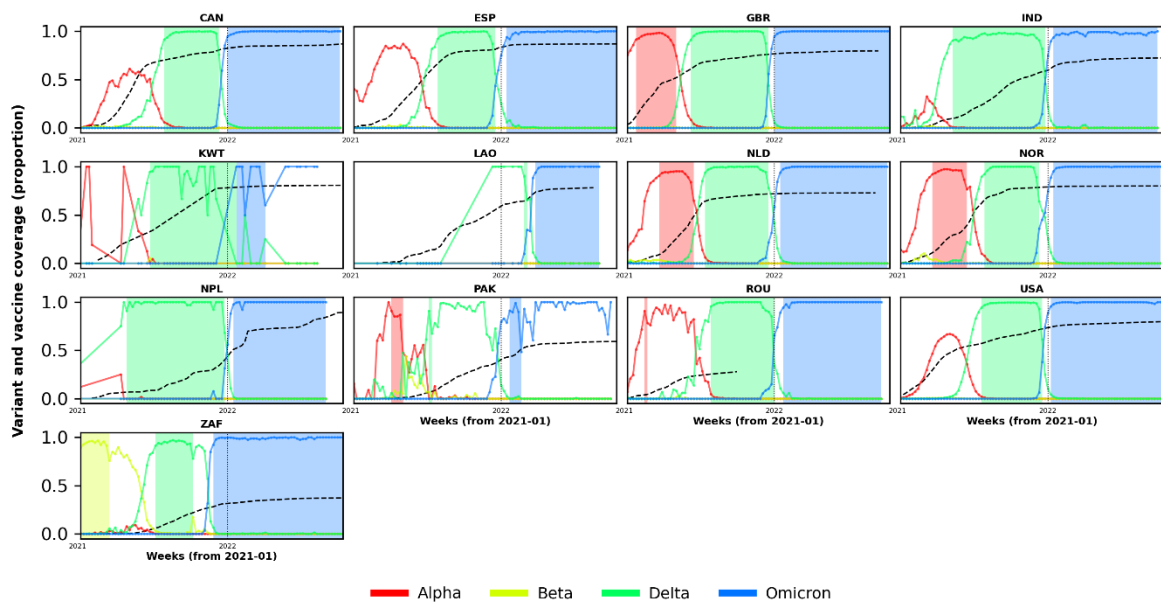

**Figure S2. Frequency of vaccination history by 4-week period and country, related to Figure 2.** Proportions of hospitalised study participants with previous vaccination are presented in blue. Only countries with at least 100 observations were included; four-week periods with at least 5 participants are presented. Four-week periods with less than 20 participants have a star.

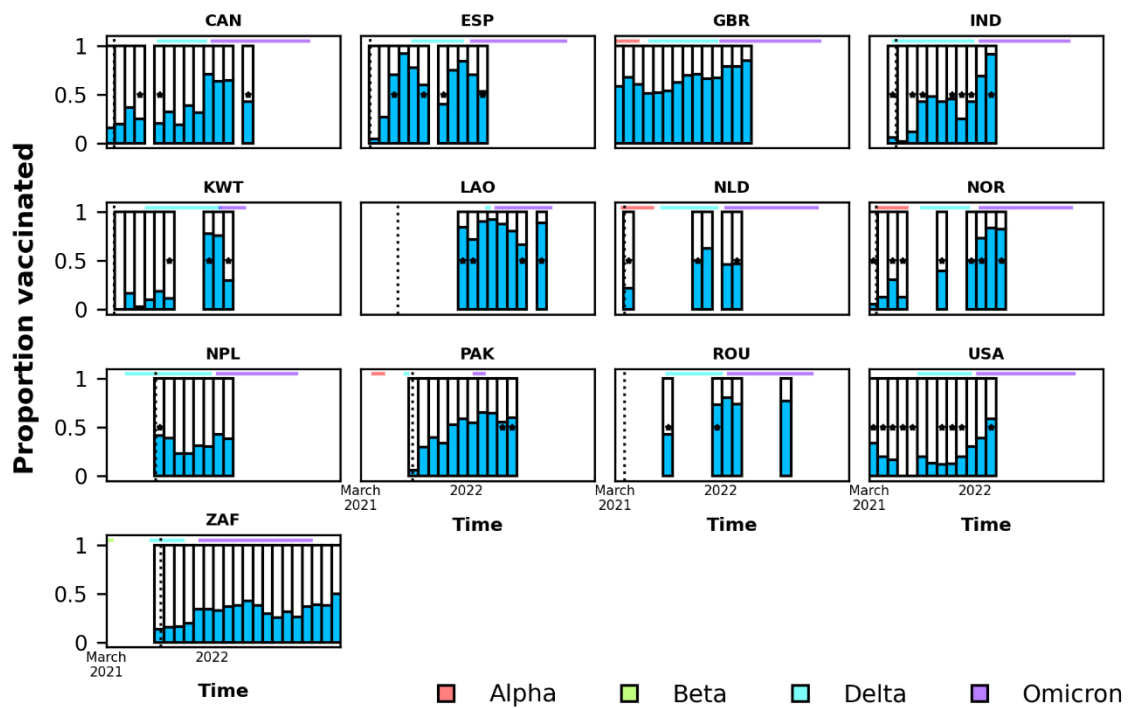



**Figure S4. Fatality risks in vaccinated (y-axis) and unvaccinated (x-axis) patients by country, represented by different colours, and age; related to Figure 5.** This figure is similar to **Figure 5** in the main text, except for the range of the two axes. This version of the figure allows better visualisation of fatality risks in settings with relatively lower values. Data from countries with fatality risk above 0.30 in either group, vaccinated or unvaccinated, are not shown; note for some data points entire confidence intervals are only presented in **Figure 5**.

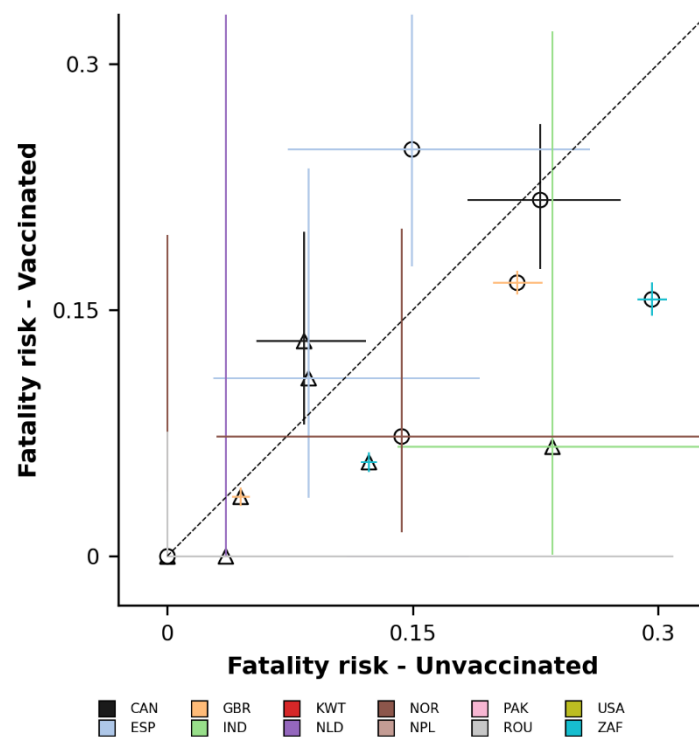

## Supplementary tables

**Table S1. Percentages of participants included in the analytic sample that required intensive care; related to the STAR Methods .** Countries highlighted in blue had more than 80% of study patients admitted to intensive care; 1,791 records had missing information on ICU admission. Only countries with at least 10 patients are presented.

| Country              | Percentage |
|----------------------|------------|
| Argentina            | 100.0      |
| India                | 100.0      |
| United Arab Emirates | 100.0      |
| Qatar                | 100.0      |
| Portugal             | 100.0      |
| Pakistan             | 100.0      |
| Austria              | 100.0      |
| Nepal                | 100.0      |
| Germany              | 100.0      |
| China                | 100.0      |
| Estonia              | 100.0      |
| Kuwait               | 98.6       |
| United States        | 97.0       |
| New Zealand          | 95.9       |
| Saudi Arabia         | 93.8       |
| Colombia             | 90.8       |
| Italy                | 89.8       |
| Malaysia             | 69.4       |
| Spain                | 66.7       |
| Brazil               | 64.6       |
| Canada               | 49.2       |
| Indonesia            | 27.6       |
| Norway               | 23.1       |
| Uganda               | 18.2       |
| Israel               | 16.7       |
| Turkey               | 16.3       |
| Netherlands          | 15.4       |
| United Kingdom       | 14.4       |
| South Africa         | 8.4        |
| Bolivia              | 7.7        |
| Philippines          | 6.3        |
| Lao PDR              | 4.8        |
| Romania              | 0.5        |
| Malawi               | 0.0        |
| Ireland              | 0.0        |

**Table S2. Frequency of previous vaccination in the analytic sample by country, related to Figure 2. Countries with at least 10 participants are included.**

| <b>Country</b>       | <b>Total N</b> | <b>% vaccinated</b> |
|----------------------|----------------|---------------------|
| Argentina            | 43             | 27.9                |
| Austria              | 34             | 2.9                 |
| Bolivia              | 13             | 30.8                |
| Brazil               | 48             | 79.2                |
| Canada               | 1297           | 44.4                |
| China                | 40             | 57.5                |
| Colombia             | 65             | 32.3                |
| Estonia              | 26             | 3.8                 |
| Germany              | 14             | 7.1                 |
| India                | 233            | 34.3                |
| Indonesia            | 29             | 69.0                |
| Ireland              | 27             | 14.8                |
| Israel               | 18             | 50.0                |
| Italy                | 49             | 8.2                 |
| Kuwait               | 208            | 21.6                |
| Lao PDR              | 393            | 87.5                |
| Malawi               | 20             | 35.0                |
| Malaysia             | 98             | 84.7                |
| Nepal                | 680            | 32.2                |
| Netherlands          | 136            | 50.0                |
| New Zealand          | 76             | 44.7                |
| Norway               | 156            | 44.9                |
| Pakistan             | 1086           | 44.5                |
| Philippines          | 66             | 78.8                |
| Portugal             | 40             | 10.0                |
| Qatar                | 19             | 5.3                 |
| Romania              | 198            | 76.8                |
| Saudi Arabia         | 16             | 37.5                |
| South Africa         | 47768          | 27.6                |
| Spain                | 312            | 59.9                |
| Turkey               | 49             | 73.5                |
| Uganda               | 11             | 45.5                |
| United Arab Emirates | 15             | 13.3                |
| United Kingdom       | 29637          | 64.2                |
| United States        | 232            | 24.1                |



**Table S3. Age distribution by vaccination status and country, related to Figures 2 and 3, and to the STAR Methods.** In **Table S3A**, median ages of vaccinated and unvaccinated patients by country are presented. Only countries contributing data on at least 100 participants are included in this table. Table S3B includes the percentages of patients aged 60 years or older, by vaccination status, country and calendar year. Percentages based on 20 or fewer observations are highlighted in orange. Only countries with at least 100 patients included in the analytic sample are presented.

**Table S3A**

| Country        | Median (IQR) age in years |                     |
|----------------|---------------------------|---------------------|
|                | <i>Vaccinated</i>         | <i>Unvaccinated</i> |
| Canada         | 70 (59 - 81)              | 60 (48 - 72)        |
| India          | 64 (56 - 71)              | 57 (41 - 69)        |
| Kuwait         | 57 (47 - 67)              | 48 (39 - 61)        |
| Lao PDR        | 34 (27 - 42)              | 52 (36 - 70)        |
| Nepal          | 64 (50 - 74)              | 58 (42 - 74)        |
| Netherlands    | 75 (69 - 80)              | 57 (48 - 73)        |
| Norway         | 73 (57 - 80)              | 51 (44 - 61)        |
| Pakistan       | 64 (50 - 73)              | 62 (50 - 73)        |
| Romania        | 52 (40 - 64)              | 54 (45 - 60)        |
| South Africa   | 57 (43 - 71)              | 49 (34 - 65)        |
| Spain          | 69 (60 - 77)              | 62 (50 - 69)        |
| United Kingdom | 72 (57 - 82)              | 49 (37 - 63)        |
| United States  | 66 (58 - 73)              | 57 (46 - 66)        |

**Table S3B**

| Country        | 2021              |                     | 2022              |                     |
|----------------|-------------------|---------------------|-------------------|---------------------|
|                | <i>Vaccinated</i> | <i>Unvaccinated</i> | <i>Vaccinated</i> | <i>Unvaccinated</i> |
| Canada         | 76.1              | 50.2                | 69.5              | 56.9                |
| India          | 53.3              | 39.4                | 80.0              | 87.5                |
| Kuwait         | 34.8              | 26.8                | 50.0              | 64.3                |
| Lao PDR        | 5.3               | 66.7                | 6.8               | 37.0                |
| Nepal          | 62.6              | 44.9                | 66.3              | 59.6                |
| Netherlands    | 90.2              | 56.8                | 85.2              | 35.5                |
| Norway         | 59.1              | 24.3                | 77.1              | 75.0                |
| Pakistan       | 58.2              | 56.2                | 64.3              | 70.8                |
| Romania        | 30.8              | 50.0                | 32.4              | 21.1                |
| South Africa   | 41.2              | 33.7                | 47.5              | 34.3                |
| Spain          | 75.4              | 52.0                | 75.4              | 60.0                |
| United Kingdom | 70.3              | 29.2                | 75.5              | 50.4                |
| United States  | 77.4              | 41.5                | 68.0              | 55.2                |

**Table S4. Frequencies of symptoms in vaccinated and unvaccinated patients, related to Figure 3.** Table S4A presents frequencies of different symptoms by vaccination status in the combined dataset; data from South Africa are not included. Of participants with data on at least one symptom, vaccinated patients reported a median of 3 different symptoms (IQR, 2 – 5), whilst unvaccinated patients had a median of 4 symptoms (IQR, 2 – 5). Considering only the ICU country group, the median numbers of symptoms in vaccinated and unvaccinated patients were similar, 3 (IQR 2 – 4). URT, upper respiratory tract. In Table S4B, percentages of participants with at least one of the five most common symptoms are presented by vaccination status for the different SARS-CoV-2 variant periods. Only patients with data on all five symptoms (see *Results* section) are included.

**Table S4A**

| Symptoms            | Vaccinated |                     |              | Unvaccinated |                     |              |
|---------------------|------------|---------------------|--------------|--------------|---------------------|--------------|
|                     | %          | Total (non-missing) | Missing data | %            | Total (non-missing) | Missing data |
| Abdominal pain      | 9.6        | 14146               | 7519         | 8.9          | 10669               | 3061         |
| Confusion           | 20.2       | 14434               | 7231         | 11.2         | 10747               | 2983         |
| Bleeding            | 1.8        | 14036               | 7629         | 1.2          | 10570               | 3160         |
| Chest pain          | 17.0       | 14494               | 7171         | 22.9         | 10958               | 2772         |
| Conjunctivitis      | 0.2        | 13542               | 8123         | 0.2          | 10229               | 3501         |
| Cough               | 64.7       | 15345               | 6320         | 74.2         | 11576               | 2154         |
| Diarrhoea           | 15.9       | 14433               | 7232         | 19.9         | 10905               | 2825         |
| Ear pain            | 0.3        | 11465               | 10200        | 0.5          | 8262                | 5468         |
| Fatigue/Malaise     | 42.6       | 14084               | 7581         | 45.8         | 10692               | 3038         |
| Headache            | 14.0       | 13525               | 8140         | 17.7         | 10340               | 3390         |
| Fever               | 51.2       | 14942               | 6723         | 67.1         | 11330               | 2400         |
| Altered smell       | 6.7        | 12904               | 8761         | 11.6         | 9835                | 3895         |
| Altered taste       | 8.1        | 12744               | 8921         | 13.2         | 9714                | 4016         |
| Lymphadenopathy     | 0.4        | 13582               | 8083         | 0.4          | 10275               | 3455         |
| Muscle/joint pain   | 16.7       | 13344               | 8321         | 23.7         | 10283               | 3447         |
| Runny nose          | 5.2        | 13126               | 8539         | 3.7          | 9908                | 3822         |
| Seizures            | 1.0        | 14096               | 7569         | 0.8          | 10612               | 3118         |
| Severe dehydration  | 12.1       | 8356                | 13309        | 10.4         | 4951                | 8779         |
| Shortness of breath | 63.8       | 15480               | 6185         | 76.2         | 11659               | 2071         |
| Skin rash           | 1.3        | 13801               | 7864         | 1.1          | 10448               | 3282         |
| Sore throat         | 9.2        | 13154               | 8511         | 10.0         | 9964                | 3766         |
| Vomiting/nausea     | 20.1       | 14492               | 7173         | 24.0         | 10969               | 2761         |
| Wheezing            | 7.6        | 13703               | 7962         | 5.5          | 10285               | 3445         |
| URT symptoms        | 11.5       | 13428               | 8237         | 11.8         | 10128               | 3602         |

**Table S4B**

| Variant | Vaccinated |                 | Unvaccinated |                 |
|---------|------------|-----------------|--------------|-----------------|
|         | Total      | % with symptoms | Total        | % with symptoms |
| Alpha   | 822        | 76.6            | 680          | 91.3            |
| Delta   | 7500       | 93.8            | 6100         | 96.8            |
| Omicron | 3242       | 87.1            | 1312         | 90.7            |

**Table S5. Additional information on comorbidities and clinical outcomes, related to Figure 4 and Figure 5. Table S5A** includes the percentages of patients with 3 or more comorbidities by vaccination status and variant-defined epidemiological period. **Table S5B** shows percentages of patients who died in the first 28 days after hospital admission or disease onset, whichever happened later. Criteria for inclusion in these calculations are described in the *Methods* section. **Table S5C** shows presents the frequency of the composite outcome by country group, age and vaccination status.

**Table S5A**

| Variant | <i>Vaccinated</i>              |       | <i>Unvaccinated</i>            |       |
|---------|--------------------------------|-------|--------------------------------|-------|
|         | % with 3 or more comorbidities | Total | % with 3 or more comorbidities | Total |
| Alpha   | 70.1                           | 1082  | 33.2                           | 749   |
| Delta   | 54.4                           | 11777 | 16.8                           | 14186 |
| Omicron | 27.7                           | 12216 | 11.0                           | 12785 |

**Table S5B**

| Country        | Total | % 28-day fatality |
|----------------|-------|-------------------|
| Romania        | 182   | 0.0               |
| Norway         | 114   | 5.3               |
| United Kingdom | 27984 | 11.7              |
| South Africa   | 46695 | 15.9              |
| Canada         | 1143  | 17.4              |
| Spain          | 304   | 17.4              |
| Netherlands    | 108   | 26.9              |
| India          | 175   | 29.7              |
| United States  | 228   | 34.6              |
| Kuwait         | 196   | 45.9              |
| Pakistan       | 702   | 49.4              |
| Nepal          | 273   | 65.2              |

**Table S5C**

| <i>Countries with less than 80% ICU admission</i> |                     |                                    |                   |                                    |                                    |
|---------------------------------------------------|---------------------|------------------------------------|-------------------|------------------------------------|------------------------------------|
| <i>Age<br/>(years)</i>                            | <b>Unvaccinated</b> |                                    | <b>Vaccinated</b> |                                    | <i>%<br/>composite<br/>outcome</i> |
|                                                   | <i>Total</i>        | <i>%<br/>composite<br/>outcome</i> | <i>Total</i>      | <i>%<br/>composite<br/>outcome</i> |                                    |
| 18-60                                             | 29747               | 14.1                               | 12814             | 8.1                                |                                    |
| >60                                               | 14896               | 32.0                               | 18412             | 20.8                               |                                    |

  

| <i>ICU country group</i> |                     |                                    |                   |                                    |                                    |
|--------------------------|---------------------|------------------------------------|-------------------|------------------------------------|------------------------------------|
| <i>Age<br/>(years)</i>   | <b>Unvaccinated</b> |                                    | <b>Vaccinated</b> |                                    | <i>%<br/>composite<br/>outcome</i> |
|                          | <i>Total</i>        | <i>%<br/>composite<br/>outcome</i> | <i>Total</i>      | <i>%<br/>composite<br/>outcome</i> |                                    |
| 18-60                    | 941                 | 88.1                               | 367               | 90.7                               |                                    |
| >60                      | 887                 | 91.4                               | 591               | 90.9                               |                                    |

**Table S6. Mixed effects logistic models on death in the first 28 days after admission or disease onset, related to Figure 5.** We present results for three models. For model III, that includes number of comorbidities as a covariate, only patients with data on at least 10 comorbidity variables were included (N = 54,738); the number of individuals analysed in models I and II were 78,769 and 78,733, respectively. In addition to adjusting for coexisting medical conditions by including number of comorbidities as a covariate, we also fit a model that included instead a binary variable defined based on whether patients had three or more comorbidities; the estimated odds ratio for the association between vaccination and death outcome was similar to the odds ratios in the table..

| Model                               | I                   | II                  | III                 |
|-------------------------------------|---------------------|---------------------|---------------------|
| Variables                           | Odds ratio (95% CI) | Odds ratio (95% CI) | Odds ratio (95% CI) |
| <i>Previous vaccination</i>         | 0.77 (0.74 - 0.80)  | 0.59 (0.56 - 0.62)  | 0.53 (0.50 - 0.56)  |
| <i>Sex (Female)</i>                 | -                   | 0.87 (0.84 - 0.91)  | 0.85 (0.81 - 0.90)  |
| <i>Age</i>                          |                     |                     |                     |
| <i>Aged between 18 and 60 years</i> | -                   | Reference           | Reference           |
| <i>Older than 60 years</i>          | -                   | 3.41 (3.27 - 3.57)  | 2.89 (2.73 - 3.05)  |
| <i>Number of comorbidities</i>      | -                   | -                   | 1.25 (1.23 - 1.27)  |

**Table S7. Sensitivity analysis I, that includes data from all records from March 2021 regardless of country-level vaccination coverage, related to Table 2 and Figure 5. Table S7A includes information on multiple comorbidities; and Table S7B, on fatality risk.**

**Table S7A**

| Country        | <i>Vaccinated</i>              |       | <i>Unvaccinated</i>            |       |
|----------------|--------------------------------|-------|--------------------------------|-------|
|                | % with 3 or more comorbidities | Total | % with 3 or more comorbidities | Total |
| Canada         | 63.1                           | 563   | 40.0                           | 732   |
| India          | 13.6                           | 88    | 19.9                           | 362   |
| Kuwait         | 26.1                           | 46    | 27.6                           | 181   |
| Lao PDR        | 0.6                            | 344   | 14.3                           | 49    |
| Malawi         | 5.3                            | 38    | 7.1                            | 170   |
| Nepal          | 5.5                            | 219   | 4.5                            | 463   |
| Netherlands    | 62.5                           | 72    | 37.2                           | 113   |
| Norway         | 58.9                           | 73    | 27.0                           | 115   |
| Pakistan       | 1.0                            | 488   | 1.3                            | 628   |
| Peru           | -                              | < 10  | 6.4                            | 204   |
| Philippines    | 32.1                           | 53    | 20.5                           | 122   |
| Romania        | 12.5                           | 152   | 15.2                           | 46    |
| South Africa   | 7.7                            | 11685 | 7.9                            | 39298 |
| Spain          | 50.8                           | 187   | 30.0                           | 150   |
| United Kingdom | 65.3                           | 15450 | 37.1                           | 6642  |
| United States  | 78.6                           | 56    | 50.9                           | 175   |

**Table S7B**

| Country        | Total | % 28-day fatality |
|----------------|-------|-------------------|
| Romania        | 182   | 0.0               |
| Philippines    | 170   | 2.4               |
| Peru           | 175   | 3.4               |
| Norway         | 125   | 5.6               |
| United Kingdom | 27984 | 11.7              |
| Malawi         | 171   | 11.7              |
| Spain          | 327   | 16.8              |
| Canada         | 1178  | 17.2              |
| South Africa   | 80225 | 20.6              |
| Netherlands    | 157   | 24.8              |
| Colombia       | 101   | 27.7              |
| India          | 388   | 30.2              |
| United States  | 228   | 34.6              |
| Kuwait         | 214   | 44.9              |
| Pakistan       | 730   | 48.8              |
| Nepal          | 275   | 64.7              |

**Table S8. Sensitivity analysis II, that uses a vaccination coverage of 20%, rather than 10%, relates to Table 2 and Figure 5. Table S8A** includes information on multiple comorbidities; and **Table S8B**, on fatality risk.

**Table S8A**

| Country        | <i>Vaccinated</i>              |       | <i>Unvaccinated</i>            |       |
|----------------|--------------------------------|-------|--------------------------------|-------|
|                | % with 3 or more comorbidities | Total | % with 3 or more comorbidities | Total |
| Canada         | 65.3                           | 490   | 41.9                           | 382   |
| India          | 7.8                            | 77    | 9.6                            | 83    |
| Kuwait         | 28.2                           | 39    | 42.5                           | 73    |
| Lao PDR        | 0.6                            | 344   | 14.3                           | 49    |
| Nepal          | 5.2                            | 172   | 4.6                            | 388   |
| Netherlands    | 64.1                           | 64    | 26.9                           | 52    |
| Norway         | 58.2                           | 67    | 27.8                           | 54    |
| Pakistan       | 1.1                            | 440   | 1.4                            | 443   |
| Romania        | 12.5                           | 152   | 15.2                           | 46    |
| South Africa   | 7.5                            | 7817  | 7.4                            | 13020 |
| Spain          | 50.8                           | 187   | 24.0                           | 96    |
| United Kingdom | 65.3                           | 15450 | 37.1                           | 6642  |
| United States  | 78.6                           | 56    | 50.9                           | 175   |

**Table S8B**

| Country        | Total | % 28-day fatality |
|----------------|-------|-------------------|
| Romania        | 182   | 0.0               |
| Norway         | 101   | 5.0               |
| United Kingdom | 27984 | 11.7              |
| South Africa   | 32429 | 12.4              |
| Spain          | 275   | 17.8              |
| Canada         | 812   | 19.7              |
| India          | 102   | 24.5              |
| United States  | 228   | 34.6              |
| Kuwait         | 104   | 45.2              |
| Pakistan       | 542   | 48.3              |
| Nepal          | 230   | 64.8              |

**Table S9. Frequency of symptoms in the subset of dataset that includes only patients admitted to hospital before March 2021, related to Figure 3. URT, upper respiratory tract.**

| Symptoms            | %    | Total (non-missing) | Missing data |
|---------------------|------|---------------------|--------------|
| Abdominal pain      | 8.2  | 189557              | 52057        |
| Confusion           | 19.3 | 192340              | 49274        |
| Bleeding            | 1.6  | 186198              | 55416        |
| Chest pain          | 12.5 | 193203              | 48411        |
| Conjunctivitis      | 0.3  | 181292              | 60322        |
| Cough               | 56.6 | 207817              | 33797        |
| Diarrhoea           | 15.6 | 195943              | 45671        |
| Ear pain            | 0.3  | 151125              | 90489        |
| Fatigue/Malaise     | 38.4 | 189812              | 51802        |
| Headache            | 10.7 | 183150              | 58464        |
| Fever               | 55.9 | 207805              | 33809        |
| Altered smell       | 6.7  | 149454              | 92160        |
| Altered taste       | 7.9  | 146449              | 95165        |
| Lymphadenopathy     | 0.5  | 170118              | 71496        |
| Muscle/joint pain   | 17.6 | 182933              | 58681        |
| Runny nose          | 3.0  | 177037              | 64577        |
| Seizures            | 1.0  | 185116              | 56498        |
| Severe dehydration  | 12.3 | 83798               | 157816       |
| Shortness of breath | 59.1 | 208651              | 32963        |
| Skin rash           | 2.2  | 182858              | 58756        |
| Sore throat         | 7.0  | 177129              | 64485        |
| Vomiting nausea     | 15.6 | 195379              | 46235        |
| Wheezing            | 5.9  | 181987              | 59627        |
| URT symptoms        | 9.0  | 182199              | 59415        |



**Table S10. Country-specific percentages of patients admitted to hospital before March 2021 who had 3 or more comorbidities, related Table 2.** Only patients with data on at least ten comorbidity-related variables are included in this table.

| Country              | % with 3 or more comorbidities | Total  |
|----------------------|--------------------------------|--------|
| Argentina            | 35.0                           | 100    |
| Australia            | 18.9                           | 424    |
| Belgium              | 47.0                           | 779    |
| Brazil               | 34.0                           | 3164   |
| Cameroon             | 0.6                            | 179    |
| Canada               | 59.9                           | 3500   |
| Chile                | 36.0                           | 111    |
| Colombia             | 27.7                           | 444    |
| France               | 41.6                           | 4612   |
| Germany              | 39.7                           | 116    |
| Ghana                | 0.8                            | 2453   |
| Gibraltar            | 5.3                            | 394    |
| Guinea               | 1.4                            | 1086   |
| India                | 14.9                           | 3262   |
| Indonesia            | 30.0                           | 701    |
| Ireland              | 45.7                           | 1305   |
| Israel               | 14.4                           | 1021   |
| Italy                | 34.1                           | 3133   |
| Kuwait               | 29.0                           | 563    |
| Malaysia             | 6.8                            | 5737   |
| Nepal                | 2.8                            | 959    |
| Netherlands          | 35.8                           | 1871   |
| Norway               | 8.0                            | 3193   |
| Pakistan             | 7.6                            | 4671   |
| Peru                 | 4.9                            | 1340   |
| Philippines          | 15.1                           | 106    |
| Portugal             | 46.8                           | 1037   |
| Qatar                | 11.8                           | 306    |
| Romania              | 14.1                           | 722    |
| Russian Federation   | 31.3                           | 1658   |
| Senegal              | 3.8                            | 133    |
| South Africa         | 9.7                            | 133204 |
| Spain                | 14.4                           | 11652  |
| Uganda               | 3.3                            | 212    |
| Ukraine              | 63.1                           | 103    |
| United Arab Emirates | 21.4                           | 145    |
| United Kingdom       | 56.0                           | 157894 |
| United States        | 46.7                           | 4118   |
